# Supplementary material for: Age-Related Differences in Percentages of Regulatory and Effector T Lymphocytes and Their Subsets in Healthy Individuals and Characteristic STAT1/STAT5 Signalling Response in Helper T Lymphocytes
Source: PubMed Central journal article supplement (PMC4615205; doi:10.1155/2015/352934), 2015-10-07
Supplement: 352934.f1.pdf [file 352934.f1.pdf]

## Additional file provided with this submission

Additional file 1: Table S1. Concentrations of remaining studied cell subsets in all three age groups of healthy subjects analysed by flow cytometry (\*P < 0.05; \*\*P < 0.01; \*\*\*P < 0.001; \*\*\*\*P < 0.0001).

|                                                                  | children <sup>A</sup> |               |  | adolescents <sup>B</sup> |                                 |  | adults <sup>C</sup> |                                       |  |
|------------------------------------------------------------------|-----------------------|---------------|--|--------------------------|---------------------------------|--|---------------------|---------------------------------------|--|
|                                                                  | N                     | mean ± SD     |  | N                        | mean ± SD                       |  | N                   | mean ± SD                             |  |
| Th (x10 <sup>9</sup> mL <sup>-1</sup> )                          | 20                    | 0.90 ± 0.63   |  | 20                       | 0.61 ± 0.19                     |  | 20                  | 0.76 ± 0.20                           |  |
| Tc (x10 <sup>9</sup> mL <sup>-1</sup> )                          | 20                    | 0.57 ± 0.42   |  | 20                       | 0.36 ± 0.16                     |  | 20                  | 0.42 ± 0.23                           |  |
| DNT (x10 <sup>9</sup> mL <sup>-1</sup> )                         | 20                    | 0.15 ± 0.10   |  | 20                       | 0.08 ± 0.04                     |  | 20                  | 0.05 ± 0.04 <sup>AC***</sup>          |  |
| HLA-DR (x10 <sup>9</sup> mL <sup>-1</sup> )                      | 19                    | 0.25 ± 0.32   |  | 20                       | 0.17 ± 0.12                     |  | 20                  | 0.25 ± 0.14                           |  |
| Th1 (x10 <sup>9</sup> mL <sup>-1</sup> )                         | 20                    | 0.088 ± 0.054 |  | 20                       | 0.100 ± 0.055                   |  | 20                  | 0.147 ± 0.052 <sup>AC**,BC*</sup>     |  |
| Th2 (x10 <sup>9</sup> mL <sup>-1</sup> )                         | 20                    | 0.029 ± 0.034 |  | 20                       | 0.022 ± 0.012                   |  | 20                  | 0.044 ± 0.028 <sup>AC*,BC**</sup>     |  |
| Th1Th17 (x10 <sup>9</sup> mL <sup>-1</sup> )                     | 20                    | 0.024 ± 0.013 |  | 20                       | 0.055 ± 0.024 <sup>AB***</sup>  |  | 20                  | 0.086 ± 0.049 <sup>AC****</sup>       |  |
| Th17 CD161 <sup>+</sup> (x10 <sup>9</sup> mL <sup>-1</sup> )     | 20                    | 0.009 ± 0.007 |  | 20                       | 0.007 ± 0.005                   |  | 20                  | 0.015 ± 0.007 <sup>AC*,BC**</sup>     |  |
| Th17 CD161 <sup>-</sup> (x10 <sup>9</sup> mL <sup>-1</sup> )     | 20                    | 0.016 ± 0.019 |  | 20                       | 0.016 ± 0.009                   |  | 20                  | 0.028 ± 0.014 <sup>AC***,BC*</sup>    |  |
| Th17 total (x10 <sup>9</sup> mL <sup>-1</sup> )                  | 20                    | 0.025 ± 0.025 |  | 20                       | 0.024 ± 0.012                   |  | 20                  | 0.042 ± 0.020 <sup>AC***,BC**</sup>   |  |
| aTreg (x10 <sup>9</sup> mL <sup>-1</sup> )                       | 20                    | 0.010 ± 0.006 |  | 20                       | 0.012 ± 0.005                   |  | 20                  | 0.022 ± 0.009 <sup>AC****,BC**</sup>  |  |
| rTreg (x10 <sup>9</sup> mL <sup>-1</sup> )                       | 20                    | 0.044 ± 0.037 |  | 20                       | 0.010 ± 0.005 <sup>AB*</sup>    |  | 20                  | 0.007 ± 0.005 <sup>AC****</sup>       |  |
| FoxP3 <sup>+</sup> non Treg (x10 <sup>9</sup> mL <sup>-1</sup> ) | 20                    | 0.024 ± 0.018 |  | 20                       | 0.019 ± 0.009                   |  | 20                  | 0.024 ± 0.009                         |  |
| Treg total (x10 <sup>9</sup> mL <sup>-1</sup> )                  | 20                    | 0.054 ± 0.040 |  | 20                       | 0.022 ± 0.007                   |  | 20                  | 0.029 ± 0.011                         |  |
| Teff (x10 <sup>9</sup> mL <sup>-1</sup> )                        | 18                    | 0.214 ± 0.127 |  | 19                       | 0.243 ± 0.091                   |  | 20                  | 0.434 ± 0.148 <sup>AC****,BC***</sup> |  |
| CD25-FoxP3 <sup>+</sup> (x10 <sup>9</sup> mL <sup>-1</sup> )     | 20                    | 0.039 ± 0.034 |  | 20                       | 0.006 ± 0.005 <sup>AB****</sup> |  | 20                  | 0.010 ± 0.010 <sup>AC***</sup>        |  |

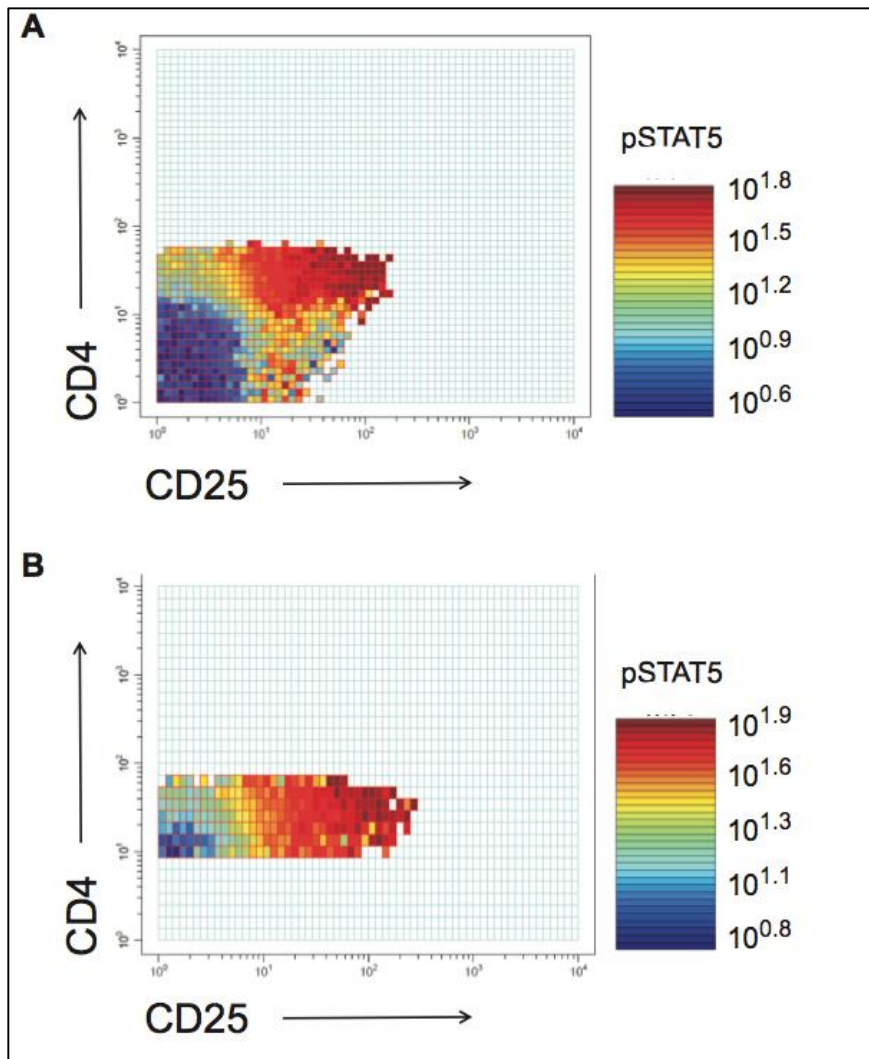

**Additional file 2: Figure S1. pSTAT5 after IL-2 stimulation in Th lymphocytes depends on levels of IL-2Ralpha.** Whole blood samples were stimulated with IL-2, stained with anti-CD25 antibodies and prepared for the analysis of Th cell STAT5 signalling as described in materials and methods. Representative plots of gated lymphocytes (A) and CD4+ Th cells (B) from healthy donors are shown. The small boxes represent individual bins within the distribution of CD25 (IL-2Ralpha) and CD4. Within each bin, the geometric mean fluorescence intensity of the response channel (pSTAT5) was calculated for display using the ScatterSlice software: pSTAT5 for varying levels of IL-2Ralpha and CD4 as defined by the colour code shown on the right.
